# Supplementary material
Source: PubMed Central journal article supplement (PMC2423241)

Supplemental Figure 1. **EMCV, VEGF, HIF-1 $\alpha$  and HIF-2 $\alpha$  5'UTRs mediate capindependent translation under normoxic and hypoxic conditions in the dicistronic vector assay.** (A) Schematic representation of the dicistronic vector. NIH3T3 cells were transiently transfected with the listed dicistronic vector constructs and then cultured under (B) moderate (0.5% O<sub>2</sub> for 42 h) or (C) severe (O<sub>2</sub> < 0.1% 16 h) hypoxic conditions with a normoxic control and assayed for luciferase activity. Luciferase activity was expressed as the ratio of Fluc/Rluc to indicate the relative level of IRES to cap-dependent translation. The value of Fluc/Rluc was normalized to the control pRF that was set at 1.

Supplemental Figure 2. **Analysis of p57<sup>Kip2</sup> degradation.** HeLa cells were cultured under prolonged, severe hypoxic stress (O<sub>2</sub> < 0.1% 16 h) and then treated with cycloheximide for 30, 60, 90 and 120 min. Levels of p57<sup>Kip2</sup> protein were analyzed by western blot and relative numerical levels are displayed below. Values were normalized to the normoxic 0' CHX sample that was set to 1.

**A**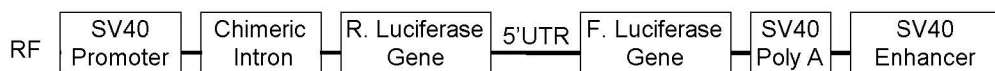**B**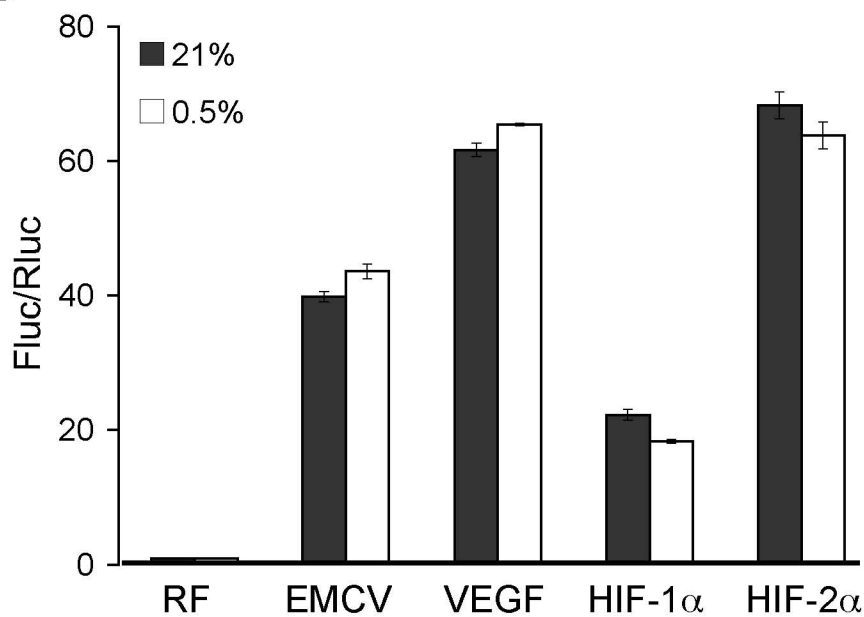**C**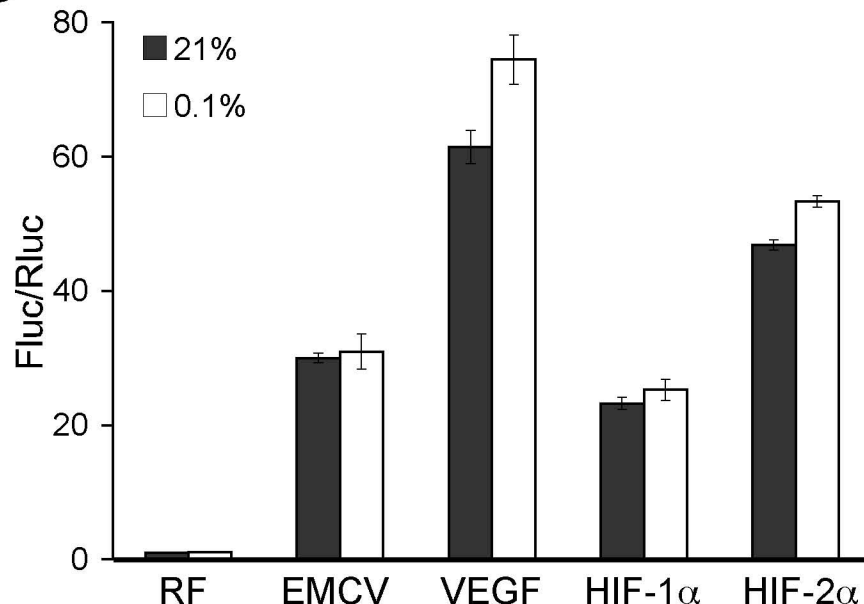

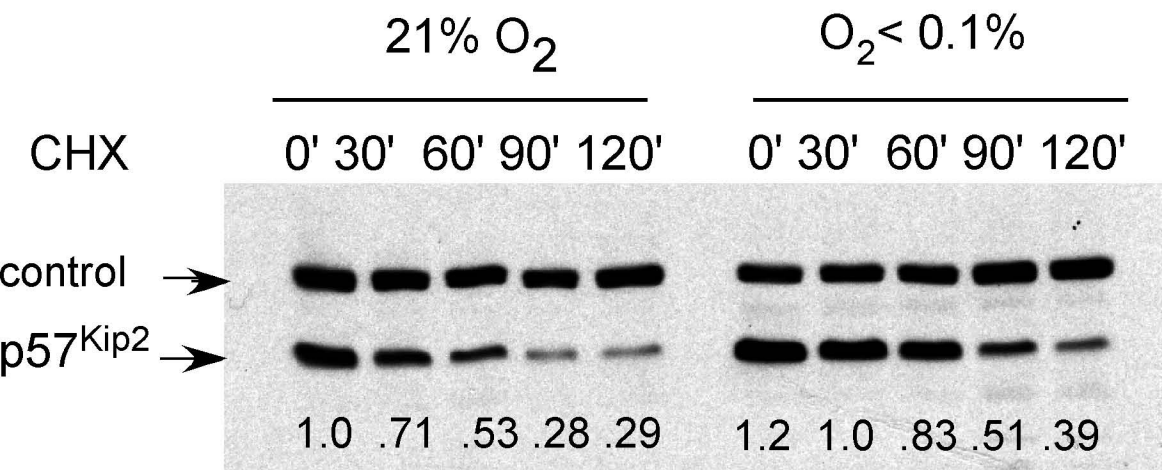

Supplement: supp_M710079200_Suppdata.pdf [file supp_M710079200_Suppdata.pdf]
